# Supplementary material for: Pre-collapse motion of the February 2021 Chamoli rock-ice avalanche, Indian Himalaya
Source: Copernicus journal article supplement (doi:10.5194/nhess-2021-333), 2021-11-10
Supplement: Supplementary file [file nhess-2021-333-AC2-supplement.pdf]

# Pre-collapse motion of the February 2021 Chamoli rock-ice avalanche, Indian Himalaya

Maximillian Van Wyk de Vries<sup>1,2</sup>, Shashank Bhushan<sup>3</sup>, Mylène Jacquemart<sup>4,5</sup>, César Deschamps-Berger<sup>6</sup>, Etienne Berthier<sup>7</sup>, Simon Gascoïn<sup>6</sup>, David E. Shean<sup>3</sup>, Dan H. Shugar<sup>8</sup>, and Andreas Kääh<sup>9</sup>

<sup>1</sup>St Anthonys Falls laboratory, University of Minnesota, Minneapolis, MN, USA

<sup>2</sup>Department of Earth and Environmental Sciences, University of Minnesota, Minneapolis, MN, USA

<sup>3</sup>Department of Civil and Environmental Engineering, University of Washington, Seattle, WA, USA

<sup>4</sup>Laboratory for Hydraulics, Hydrology, and Glaciology (VAW), ETH Zurich, Zurich, Switzerland

<sup>5</sup>Swiss Federal Institute for Forest, Snow, and Landscape Research (WSL), Birmensdorf, Switzerland

<sup>6</sup>CESBIO, Université de Toulouse, CNRS, CNES, IRD, INRAE, UPS, Toulouse, France

<sup>7</sup>LEGOS, Université de Toulouse, CNES, CNRS, IRD, UPS, Toulouse, France

<sup>8</sup>Water, Sediment, Hazards, and Earth-surface Dynamics (waterSHED) Lab, Department of Geoscience, University of Calgary, Canada

<sup>9</sup>Department of Geosciences, University of Oslo, Oslo, Norway

**Correspondence:** Maximillian Van Wyk de Vries (vanwy048@umn.edu)

## Response to Reviews

### Review 2

We thank the reviewer for their comments and suggestions on our manuscript. We have responded to the comments in detail below, with the review comments given in black and our responses in red. While we disagree with the reviewer's assertion that our manuscript is outside of NHESS's scope, we are grateful for the reviewer's questions and implement changes to our manuscript in line with these.

The manuscript focuses on investigating pre-failure surface displacement for the case study of the 2021 Chamoly avalanche. The case is undoubtedly interesting but, in my opinion, the manuscript should not be considered for publication in NHESS. In the aims and scope of the journal it is stated that "The following are generally considered out-of-scope or we do not encourage: [...] Localised case studies with no broader implications (in other words, ask yourself, what would someone else in another region learn from the case study that you have done; what is the broader context?)." While I recognise that the authors' work could have broader implications, these are not discussed at all in the manuscript. The manuscript is indeed completely focused on the case study and the authors make indeed conclusions (e.g., the unpredictability of the timing of collapse) only for the case study and do not discuss what they learned in terms of general implications.

We thank the reviewer for acknowledging the potential interest in our study but disagree that this manuscript is outside the scope of NHESS.

Reviewing the scope of the journal, we see the following three points:

- the study of the evolution of natural systems towards extreme conditions, and the detection and monitoring of precursors of the evolution;
- the detection, monitoring, and modelling of natural phenomena, and the integration of measurements and models for the understanding and forecasting of the behaviour and the spatial and temporal evolution of hazardous natural events as well as their consequences;
- the design, development, experimentation, and validation of new techniques, methods, and tools for the detection, mapping, monitoring, and modelling of natural hazards and their human, environmental, and societal consequences;

We believe that our manuscript, through an in-depth study of the Chamoli rock-ice avalanche pre-collapse conditions and the methods used to assess this instability, contributes to all three of these points. Furthermore, we do not believe that the reviewer's statement "While the authors' work could have broader implications, these are not discussed at all" is accurate. Even in its present state, our objectives are broad enough to be of relevance beyond the Chamoli rock-ice avalanche (e.g. our objective line 110: "Would these pre-collapse datasets and tools would be adequate to identify this hazardous slope without the prior knowledge of its failure?"), and we dedicate an entire subsection of our Discussion to the broader implications ("Future perspectives : remote-sensing based hazard monitoring").

Indeed, one of our primary aims in this manuscript is to use the complex, but also well-studied and information-rich Chamoli rock-ice avalanche to evaluate the potential of Earth Observation datasets to detect unstable slopes and landslides prior to their occurrence. When discussed from this perspective, we believe that detailed individual case studies can contribute to our understanding of hazard monitoring techniques and processes well beyond the study area. We discuss below how we have clarified and, in some cases, expanded on this aspect of our manuscript.

In summary, our detailed analysis of the Chamoli rock-ice avalanche draws conclusions that are both novel and more widely relevant for the investigation of the pre-collapse conditions of other unstable slopes, particularly in complex high-relief or glaciated environments.

A review of recently published papers in NHESS shows many examples using a detailed local case study to draw wider conclusions, for instance:

[Submarine landslide source modeling using the 3D slope stability analysis method for the 2018 Palu, Sulawesi, tsunami,](#)

[The Cambodian Mekong floodplain under future development plans and climate change,](#)

[Spatiotemporal evolution and meteorological triggering conditions of hydrological drought in the Hun River basin, NE China](#),  
[Geo-historical database of flood impacts in Alpine catchments \(HIFAVa database, Arve River, France, 1850–2015\)](#), or  
[Correlation of wind waves and sea level variations on the coast of the seasonally ice-covered Gulf of Finland](#) (all published within the past month at the time of writing).

Finally, we also note that our manuscript passed the editorial access review editor which suggests that it is potentially of interest for the NHESS readership “Manuscripts submitted to NHESS at first undergo a rapid access review by the editor [...] to identify and sort out manuscripts with obvious deficiencies in view of the above principal evaluation criteria. [...] the paper should contribute something new and interesting to the community.” ([https://www.natural-hazards-and-earth-system-sciences.net/peer\\_review/review\\_criteria.html](https://www.natural-hazards-and-earth-system-sciences.net/peer_review/review_criteria.html))

As mentioned above, we do believe that valuable points were made in this review. We therefore propose to build on these questions listed below to finalize our manuscript:

Could the timing have been predicted if more images were available (e.g., 24 prior to the collapse, 8 hours prior to the collapse, etc.)?

We agree that this is an important point and will further develop it in the discussion of our revised manuscript through a discussion of what is visible in the pre-collapse imagery, and what would need to be visible to yield useful insight into the timing of collapse.

To specifically answer this question, we do not believe that the data are available to provide a meaningful answer. This question could perhaps have been answered if any image had been collected in the hours preceding collapse, but no such image exists. We do not detect any anomalous pre-collapse increase in velocity in our Sentinel-2 feature tracking timeseries, with the final pre-collapse image pair being the 31st of January and 5th of February 2021 (8 days and 2 days prior to collapse), although the precision of displacements derived from any single image pair is low.

Furthermore, even if the collapse timing were detectable in pre-collapse imagery, this would not in itself be sufficient for the methods to be applied for hazard monitoring. For methods to be useful in hazard monitoring, the timing of collapse must be identifiable without special attention to the imagery immediately preceding collapse, as this timing will not be known.

Is it just a matter of noise or, even without noise, no trend to failure could be seen? Is it a matter of resolution, instead?

Noise and resolution are not independent in the case of feature tracking or DEM generation and differencing. For instance, in feature tracking, the choice of a larger window size will generally reduce noise levels at the cost of lower resolution. A related question could therefore be ‘For a spatial resolution sufficient to study a given unstable slope, is the signal-to-noise ratio low enough for the hazard to be monitored?’ or conversely ‘Is the minimum spatial resolution achievable while maintaining a certain signal- to-noise ratio sufficient for monitoring a given hazard?’. The use of different satellites with higher resolution can provide an improvement, but does not always do so: for instance, the 3 m resolution Planet imagery often produces velocity maps with higher noise levels than the 10m resolution Sentinel-2 imagery due to greater differences in imaging geometry between image pairs.

We discuss some of the limitations of current noise levels in the final section of our discussions and in Figure 8.

Is it a matter of mechanism of failure (e.g., a very steep tertiary creep that causes orders of magnitude of acceleration in a matter of minutes/hours?). Is this mechanism rare or typical in such a type of failures?

The exact collapse mechanism is secondary to our main research question of whether this collapse could have been detected or forecast from remotely sensed data. There is no geomechanical data available in the case of the Chamoli collapse, and any assessments of the mechanisms of failure must be conducted using remote datasets (including seismic data; <https://www.nature.com/articles/s41598-022-07491-y>) and post-event field investigations, complemented by numerical modeling or analogy to other, better instrumented, areas. Here, we propose a collapse mechanism compatible with the available data, based on a combination of permafrost thaw and loading in the headwall crack.

What is the general conclusion in terms of remote sensing capability in predicting failures/timing of failures? What types of landslides could be predicted, instead? Are there examples in the literature of successful/unsuccessful predictions of other case studies based on similar data sources? Will we ever be able to predict the timing of failure based on satellite remote sensing alone?

The final two sentences of our conclusions provide a general conclusion in terms of remote sensing capability in predicting failures/timing of failures. For convenience, we include them here:

“Finally, we assessed the potential of these datasets and approaches for monitoring other unstable slopes. While they were effective at identifying precursory signals at a known collapse site, it remains very challenging to predict such collapses with sufficient levels of confidence in high-mountain areas. “

We agree that the above questions are important, but also note that many are outside of the scope of our paper. We cannot and should not conclude in general terms about whether remote sensing is able to predict the timing of failure, as each individual site is subject to unique conditions. We found that identifying the timing of collapse at Chamoli was likely not possible. It may, however, be possible in other locations using comparable datasets.

We believe that the following paragraphs in our discussions section (lines 376-385) provides some answers to these questions, and could be further developed in a revised version of this manuscript:

“Overall, forecasting the 7 February 2021 Chamoli rock-ice avalanche prior to its occurrence from remotely sensed datasets would have been very challenging, and certainly not routine work using well-established methods. Current image resolution, characteristics, and processing algorithms result in noise levels on a similar order to the signal itself – although joint interpretation of feature tracking results, DEM differences, and satellite images does reveal clear precursory signs of slope instability. In addition, none of the data in this study are able to adequately forecast the timing of collapse. As such, current archives of satellite images do not currently appear to be practical for forecasting individual events. At the same time, this should not prevent remote monitoring of hazardous zones, particularly when adjacent to vulnerable areas. Every slope failure will exhibit a different range of pre-collapse signals, and new instabilities might be recognized in some cases. Even though the forecasting of individual events remains a challenge, these data have value for identifying zones of highest risk for in-situ monitoring or the installation of early-warning systems (Cook et al., 2021).”

Feature-tracking, DEM differencing, and InSAR datasets can be processed and analyzed on a regional or even global scale – and in many cases pre-processed datasets are already available online (Morin et al., 2016, Gardner et al., 2018). While these pre-processed datasets are not generally produced for slope stability monitoring, they can be used to improve hazard maps and reduce landslide related damage. Future advances in Earth observation satellite capabilities and processing algorithms will improve the quality of such products.”

In addition, with reference to the specific case study, I found the discussion speculative, for instance, when it came to the safety factor as all discussions on driving and resisting forces were based on general knowledge/speculation and not supported by, e.g., geomechanical data of the case study.

As we note above, no geomechanical data or other ground-based assessments of the conditions of the avalanche block are available. We are aware of this limitation and note in our Discussion section that: “In the absence of in-situ instrumentation and observations, it may not be possible to

determine the exact cause of the failure at Chamoli.”. Nevertheless, our proposed collapse mechanism is compatible with our remotely sensed data and is able to explain the mid-winter timing of collapse.

Also, the introduction is too generic, describing information that is very well known to researchers in the field. Perhaps the introduction could have focused only on recent advances in remote sensing techniques for natural hazards that are perhaps closing a knowledge gap and enabling the type of analysis conducted by the authors, albeit with remaining limitations.

We appreciate this comment about our introduction. We had aimed to provide a broad overview of each technique we had used such that our paper was more accessible to researchers beyond this specific field of study. We acknowledge that more specific information would be useful, particularly about how these techniques are currently used for landslide monitoring and will revise this section accordingly.
